# Supplementary material for: The benefits of covariate adjustment for adaptive multi-arm designs
Source: Stat Methods Med Res. 2022 Jul 25;31(11):2104–21. doi: 10.1177/09622802221114544 (PMC7613816; doi:10.1177/09622802221114544)
Supplement: sj-r-2-smm-10.1177_09622802221114544 - Supplemental material for The benefits of covariate adjustment for adaptive multi-arm designs [file sj-R-2-smm-10.1177_09622802221114544.R]

library('asd')

source('AMAD_functions.R')

####

K=3; rho1=0; rho2=0
n=100
null.v = c(0,0,0)
lfc.50=c(0, 0, 0.22)
step.50=c(0, 0.11, 0.22)
lfc.80=c(0, 0, 0.304)
step.80=c(0, 0.152, 0.304)

null.s<-compare.method(mu=null.v, seed.no=102,nsim=1000)
nsim=1000
answers.all(null.s)

out.lfc.50<-compare.method(mu=lfc.50, seed.no=1021,nsim=1000)
answers.all(out.lfc.50)

out.lfc.80<-compare.method(mu=lfc.80, seed.no=1021,nsim=1000)

out.step.50<-compare.method(mu=step.50, seed.no=1021,nsim=1000)

out.step.80<-compare.method(mu=step.80, seed.no=1021,nsim=1000)
